# Supplementary material for: Detection of Drug-Induced Thrombocytopenia Signals in Children Using Routine Electronic Medical Records
Source: Front Pharmacol. 2021 Nov 12;12:756207. doi: 10.3389/fphar.2021.756207 (PMC8633439; doi:10.3389/fphar.2021.756207)
Supplement: Supplementary file 2 [file DataSheet2.xlsx]

## Sheet: Sheet1
			Amphotericin B				Chlorpheniramine				Vancomycin				Imipenem				Fluconazole				Sulfamethoxazole				Loratadine				Meropenem				Promethazine Hydrochloride				Teicoplanin				Nystatin				Fusidic Acid
			before PS match		after PS match		before PS match		after PS match		before PS match		after PS match		before PS match		after PS match		before PS match		after PS match		before PS match		after PS match		before PS match		after PS match		before PS match		after PS match		before PS match		after PS match		before PS match		after PS match		before PS match		after PS match		before PS match		after PS match
			EG	UEG	EG	UEG	EG	UEG	EG	UEG	EG	UEG	EG	UEG	EG	UEG	EG	UEG	EG	UEG	EG	UEG	EG	UEG	EG	UEG	EG	UEG	EG	UEG	EG	UEG	EG	UEG	EG	UEG	EG	UEG	EG	UEG	EG	UEG	EG	UEG	EG	UEG	EG	UEG	EG
Age(years,mean±SE）		Mean±SE	5.40±4.21	5.14±4.17	5.40±4.21	5.10±3.97	5.15±3.94	5.14±4.14	5.15±3.94	5.37±3.99	4.06±3.85	5.17±4.13	4.06±3.85	4.05±3.76	2.45±3.55	5.16±4.12	2.45±3.55	2.50±3.48	3.51±4.02	5.19±4.12	3.51±4.02	3.52±4.04	5.30±3.91	5.09±4.17	5.30±3.91	5.44±4.15	7.50±3.88	5.13±4.12	7.50±3.88	7.64±3.88	2.95±3.73	5.23±4.12	2.95±3.73	2.94±3.61	5.89±4.03	5.12±4.13	5.89±4.03	5.80±4.11	3.01±3.53	4.13±5.16	3.01±3.53	3.02±3.44	3.05±3.69	5.23±4.12	3.05±3.69	3.08±3.44	3.42±3.87	5.17±4.12	3.42±3.87
		t		-1.085		-1.242		-0.208		3.646		17.004		-0.094		21.134		0.294		26.509		0.102		-3.748		2.151		-14.3078		0.745		37.311		-0.127		-10.243		-1.043		19.281		0.037		32.3871		0.384		18.208
		P		0.279		0.215		0.835		<0.001		<0.001		0.925		<0.001		0.769		<0.001		0.919		<0.001		0.032		<0.001		0.46		<0.001		0.899		<0.001		0.297		<0.001		0.97		<0.001		0.701		<0.001
Gender(%)		Male	213(67.83)	99388(60.35)	213(67.83)	749(59.78)	3300(62.1)	94743(60.24)	3300(62.1)	13070(61.49)	2143(60.74)	96363(60.33)	2143(60.74)	8622(61.1)	418(54.01)	99149(60.4)	418(54.01)	1712(55.3)	2541(61.66)	96513(60.29)	2541(61.66)	10427(63.26)	2865(56.21)	88192(60.43)	2865(56.21)	8147(59.09)	369(66.97)	99098(60.34)	369(66.97)	1451(65.86)	2296(59.7)	95918(60.36)	2296(59.7)	9210(59.87)	1886(62.97)	97110(60.35)	1886(62.97)	7545(62.98)	631(61.74)	98823(60.37)	631(61.74)	2554(62.51)	1954(63.09)	96267(60.26)	1954(63.09)	8183(66.06)	1000(60.24)	98163(60.34)	1000(60.24)
		Female	101(32.17)	65297(39.65)	101(32.17)	504(40.22)	2014(37.9)	62529(39.76)	2014(37.9)	8186(38.51)	1385(39.26)	63370(39.67)	1385(39.26)	5490(38.9)	356(45.99)	64992(39.6)	356(45.99)	1384(44.7)	1580(38.34)	63573(39.71)	1580(38.34)	6057(36.74)	2232(43.79)	57756(39.57)	2232(43.79)	5641(40.91)	182(33.03)	65144(39.66)	182(33.03)	752(34.14)	1550(40.3)	62987(39.64)	1550(40.3)	6174(40.13)	1109(37.03)	63793(39.65)	1109(37.03)	4435(37.02)	391(38.26)	64882(39.63)	391(38.26)	1532(37.49)	1143(36.91)	63484(39.74)	1143(36.91)	4205(33.94)	660(39.76)	64530(39.66)	660(39.76)
		c2		7.027		6.542		7.34		0.647		0.231		0.134		12.922		0.367		3.101		3.53		36.413		13.105		9.821		0.193		0.663		0.03		8.32		<0.001		645.926		0.172		10.066		9.487		0.003
		P		0.008		0.011		0.007		0.421		0.63		0.714		<0.001		0.545		0.078		0.06		<0.001		<0.001		0.002		0.66		0.415		0.863		0.004		0.999		<0.001		0.678		0.002		0.002		0.957
Major dignosis(%)	A+B	Certain infectious and parastic diseases	68(21.66)	7841(4.76)	68(21.66)	73(5.83)	188(3.54)	7665(4.87)	188(3.54)	946(4.45)	178(4.45)	7651(4.79)	178(4.45)	637(4.51)	22(2.84)	7899(4.81)	22(2.84)	55(1.78)	344(8.35)	7487(4.68)	344(8.35)	942(5.71)	87(1.71)	7755(5.31)	87(1.71)	718(5.21)	34(6.17)	7898(4.81)	34(6.17)	60(2.72)	248(6.45)	7391(4.65)	248(6.45)	957(6.22)	88(2.94)	7850(4.88)	88(2.94)	165(1.38)	75(7.34)	7856(4.8)	75(7.34)	310(7.59)	261(8.43)	7547(4.72)	261(8.43)	507(4.09)	125(7.53)	7766(4.77)	125(7.53)
	C	Neoplasms	5(1.59)	4461(2.71)	5(1.59)	47(3.75)	185(3.48)	4159(2.64)	185(3.48)	623(2.93)	226(2.93)	4152(2.6)	226(2.93)	385(2.73)	24(3.1)	4432(2.7)	24(3.1)	46(1.49)	101(2.45)	4331(2.71)	101(2.45)	517(3.14)	413(8.1)	3622(2.48)	413(8.1)	356(2.58)	11(2)	4454(2.71)	11(2)	29(1.32)	176(4.58)	4219(2.66)	176(4.58)	553(3.59)	58(1.94)	4385(2.73)	58(1.94)	81(0.68)	10(0.98)	4444(2.71)	10(0.98)	98(2.4)	57(1.84)	4378(2.74)	57(1.84)	244(1.97)	75(4.52)	4377(2.69)	75(4.52)
	D	Diseases of the blood and blood-forming organs involving the immune mechanism	27(8.6)	16600(10.08)	27(8.6)	134(10.69)	780(14.68)	15605(9.92)	780(14.68)	2340(11.01)	321(11.01)	16223(10.16)	321(11.01)	1168(8.28)	32(4.13)	16570(10.09)	32(4.13)	192(6.2)	331(8.03)	16228(10.14)	331(8.03)	1363(8.27)	795(15.6)	14183(9.72)	795(15.6)	1315(9.54)	67(12.16)	16443(10.01)	67(12.16)	151(6.85)	208(5.41)	16315(10.27)	208(5.41)	1376(8.94)	128(4.27)	16485(10.25)	128(4.27)	444(3.71)	39(3.82)	16579(10.13)	39(3.82)	233(5.7)	183(5.91)	16424(10.28)	183(5.91)	883(7.13)	176(10.6)	16417(10.09)	176(10.6)
	E	Endocrine,nutritional and metabolic diseases	1(0.32)	3176(1.93)	1(0.32)	18(1.44)	70(1.32)	3109(1.98)	70(1.32)	467(2.2)	11(2.2)	3164(1.98)	11(2.2)	240(1.7)	4(0.52)	3175(1.93)	4(0.52)	25(0.81)	47(1.14)	3126(1.95)	47(1.14)	270(1.64)	15(0.29)	3148(2.16)	15(0.29)	263(1.91)	5(0.91)	3173(1.93)	5(0.91)	27(1.23)	42(1.09)	3131(1.97)	42(1.09)	332(2.16)	8(0.27)	3170(1.97)	8(0.27)	93(0.78)	13(1.27)	3167(1.93)	13(1.27)	65(1.59)	103(3.33)	3031(1.9)	103(3.33)	165(1.33)	15(0.9)	3159(1.94)	15(0.9)
	F	Mental and behavioural disorders	0(0)	140(0.09)	0(0)	0(0)	3(0.06)	137(0.09)	3(0.06)	11(0.05)	0(0.05)	140(0.09)	0(0.05)	10(0.07)	0(0)	140(0.09)	0(0)	70(2.26)	0(0)	140(0.09)	0(0)	17(0.1)	0(0)	140(0.1)	0(0)	11(0.08)	0(0)	140(0.09)	0(0)	0(0)	0(0)	140(0.09)	0(0)	20(0.13)	0(0)	139(0.09)	0(0)	7(0.06)	0(0)	140(0.09)	0(0)	3(0.07)	3(0.1)	134(0.08)	3(0.1)	9(0.07)	0(0)	140(0.09)	0(0)
	G	Diseases of the nervous system	11(3.5)	10116(6.14)	11(3.5)	58(4.63)	201(3.78)	9867(6.27)	201(3.78)	1205(5.67)	450(5.67)	9210(5.77)	450(5.67)	945(6.7)	7(0.9)	10121(6.17)	7(0.9)	70(2.26)	197(4.78)	9897(6.18)	197(4.78)	1166(7.07)	65(1.28)	10040(6.88)	65(1.28)	588(4.26)	33(5.99)	10086(6.14)	33(5.99)	105(4.77)	321(8.35)	8965(5.64)	321(8.35)	1092(7.1)	113(3.77)	10000(6.21)	113(3.77)	266(2.22)	34(3.33)	10089(6.16)	34(3.33)	200(4.89)	335(10.82)	9675(6.06)	335(10.82)	762(6.15)	198(11.93)	9737(5.98)	198(11.93)
	H	Diseases of the eye, adnex, ear and mastoid process	0(0)	1424(0.86)	0(0)	5(0.4)	1(0.02)	1423(0.9)	1(0.02)	96(0.45)	2(0.45)	1402(0.88)	2(0.45)	116(0.82)	0(0)	1424(0.87)	0(0)	7(0.23)	5(0.12)	1419(0.89)	5(0.12)	121(0.73)	1(0.02)	1422(0.97)	1(0.02)	82(0.59)	4(0.73)	1417(0.86)	4(0.73)	10(0.45)	7(0.18)	1398(0.88)	7(0.18)	152(0.99)	1(0.03)	1423(0.88)	1(0.03)	47(0.39)	0(0)	1416(0.86)	0(0)	19(0.47)	3(0.1)	1411(0.88)	3(0.1)	88(0.71)	1(0.06)	1418(0.87)	1(0.06)
	I	Diseases of the circulation system	0(0)	4760(2.89)	0(0)	20(1.6)	48(0.9)	4696(2.99)	48(0.9)	264(1.24)	124(1.24)	4584(2.87)	124(1.24)	356(2.52)	4(0.52)	4755(2.9)	4(0.52)	48(1.55)	69(1.67)	4691(2.93)	69(1.67)	409(2.48)	27(0.53)	4707(3.23)	27(0.53)	306(2.22)	6(1.09)	4754(2.89)	6(1.09)	56(2.54)	81(2.11)	4644(2.92)	81(2.11)	395(2.57)	20(0.67)	4722(2.93)	20(0.67)	138(1.15)	13(1.27)	4738(2.89)	13(1.27)	77(1.88)	51(1.65)	4696(2.94)	51(1.65)	215(1.74)	28(1.69)	4724(2.9)	28(1.69)
	J	Diseases of the respiratory system	50(15.92)	34577(21)	50(15.92)	192(15.32)	475(8.94)	33994(21.61)	475(8.94)	2091(9.84)	524(9.84)	33712(21.11)	524(9.84)	2924(20.72)	182(23.51)	34421(20.97)	182(23.51)	699(22.58)	1278(31.01)	32891(20.55)	1278(31.01)	4263(25.86)	182(3.57)	34205(23.44)	182(3.57)	1810(13.13)	121(21.96)	34411(20.95)	121(21.96)	410(18.61)	769(19.99)	33550(21.11)	769(19.99)	3518(22.87)	48(1.6)	34587(21.5)	48(1.6)	975(8.14)	486(47.55)	33895(20.7)	486(47.55)	1505(36.83)	691(22.31)	33256(20.82)	691(22.31)	3103(25.05)	459(27.65)	33949(20.87)	459(27.65)
	K	Diseases of the digestsive system	2(0.64)	12511(7.6)	2(0.64)	45(3.59)	96(1.81)	12397(7.88)	96(1.81)	629(2.96)	199(2.96)	12280(7.69)	199(2.96)	954(6.76)	75(9.69)	12400(7.55)	75(9.69)	189(6.1)	351(8.52)	12193(7.62)	351(8.52)	1297(7.87)	42(0.82)	12431(8.52)	42(0.82)	719(5.21)	14(2.54)	12500(7.61)	14(2.54)	129(5.86)	496(12.9)	11877(7.47)	496(12.9)	1335(8.68)	313(10.45)	12144(7.55)	313(10.45)	434(3.62)	38(3.72)	12462(7.61)	38(3.72)	271(6.63)	173(5.59)	12241(7.66)	173(5.59)	806(6.51)	112(6.75)	12389(7.61)	112(6.75)
	L	Diseases of the skin and suscutaneous tissue	1(0.32)	2344(1.42)	1(0.32)	7(0.56)	98(1.84)	1848(1.18)	98(1.84)	89(0.42)	94(0.42)	2182(1.37)	94(0.42)	205(1.45)	7(0.9)	2337(1.42)	7(0.9)	28(0.9)	39(0.95)	2301(1.44)	39(0.95)	231(1.4)	26(0.51)	2299(1.58)	26(0.51)	118(0.86)	10(1.81)	2324(1.41)	10(1.81)	28(1.27)	60(1.56)	2205(1.39)	60(1.56)	162(1.05)	23(0.77)	2320(1.44)	23(0.77)	89(0.74)	49(4.79)	2264(1.38)	49(4.79)	39(0.95)	31(1)	2287(1.43)	31(1)	180(1.45)	82(4.94)	2143(1.32)	82(4.94)
	M	Diseases of the musculoskeletal system and connective tissue	5(1.59)	10492(6.37)	5(1.59)	37(2.95)	133(2.5)	10313(6.56)	133(2.5)	436(2.05)	105(2.05)	10321(6.46)	105(2.05)	844(5.98)	4(0.52)	10493(6.39)	4(0.52)	57(1.84)	125(3.03)	10338(6.46)	125(3.03)	923(5.6)	312(6.12)	9794(6.71)	312(6.12)	649(4.71)	12(2.18)	10473(6.38)	12(2.18)	134(6.08)	206(5.36)	10174(6.4)	206(5.36)	755(4.91)	49(1.64)	10441(6.49)	49(1.64)	444(3.71)	33(3.23)	10453(6.39)	33(3.23)	141(3.45)	152(4.91)	10287(6.44)	152(4.91)	512(4.13)	60(3.61)	10406(6.4)	60(3.61)
	N	Diseases of the genitourinary system	0(0)	6695(4.07)	0(0)	11(0.88)	88(1.66)	6586(4.19)	88(1.66)	259(1.22)	6(1.22)	6682(4.18)	6(1.22)	531(3.76)	5(0.65)	6690(4.08)	5(0.65)	40(1.29)	116(2.81)	6541(4.09)	116(2.81)	502(3.05)	78(1.53)	6531(4.47)	78(1.53)	422(3.06)	17(3.09)	6674(4.06)	17(3.09)	145(6.58)	97(2.52)	6507(4.09)	97(2.52)	467(3.04)	84(2.8)	6574(4.09)	84(2.8)	368(3.07)	38(3.72)	6668(4.07)	38(3.72)	196(4.8)	53(1.71)	6599(4.13)	53(1.71)	523(4.22)	20(1.2)	6667(4.1)	20(1.2)
	P	Certain conditions originating in the perinatal period	0(0)	932(0.57)	0(0)	0(0)	25(0.47)	905(0.58)	25(0.47)	61(0.29)	11(2.39)	922(0.58)	11(2.39)	72(0.51)	2(0.26)	930(0.57)	2(0.26)	43(1.39)	81(1.97)	844(0.53)	81(1.97)	207(1.26)	1(0.02)	930(0.64)	1(0.02)	71(0.51)	0(0)	932(0.57)	0(0)	3(0.14)	65(1.69)	850(0.53)	65(1.69)	191(1.24)	1(0.03)	930(0.58)	1(0.03)	39(0.33)	0(0)	931(0.57)	0(0)	19(0.47)	32(1.03)	406(0.25)	32(1.03)	85(0.69)	4(0.24)	927(0.57)	4(0.24)
	Q	Congenital malformations, deformations and chromosomal abnormalities	0(0)	19434(11.8)	0(0)	79(6.3)	50(0.94)	19354(12.31)	50(0.94)	507(2.39)	259(0.43)	19132(11.98)	259(0.43)	1932(13.69)	330(42.64)	19033(11.6)	330(42.64)	1272(41.09)	408(9.9)	19003(11.87)	408(9.9)	2228(13.52)	28(0.55)	19389(13.28)	28(0.55)	1411(10.23)	8(1.45)	19423(11.83)	8(1.45)	240(10.89)	663(17.24)	18722(11.78)	663(17.24)	2538(16.5)	496(16.56)	18323(11.39)	496(16.56)	1638(13.67)	82(8.02)	19339(11.81)	82(8.02)	445(10.89)	128(4.13)	19217(12.03)	128(4.13)	1720(13.88)	103(6.2)	19323(11.88)	103(6.2)
	R	Symptoms, signs and abnormal clinical and laboratory findings, not elsewhere classified	3(0.96)	3432(2.08)	3(0.96)	18(1.44)	86(1.62)	3320(2.11)	86(1.62)	92(0.43)	89(0.68)	3341(2.09)	89(0.68)	276(1.96)	9(1.16)	3425(2.09)	9(1.16)	53(1.71)	84(2.04)	3352(2.09)	84(2.04)	261(1.58)	30(0.59)	3380(2.32)	30(0.59)	321(2.33)	15(2.72)	3414(2.08)	15(2.72)	70(3.18)	111(2.89)	3277(2.06)	111(2.89)	220(1.43)	65(2.17)	3366(2.09)	65(2.17)	396(3.31)	23(2.25)	3407(2.08)	23(2.25)	59(1.44)	61(1.97)	3333(2.09)	61(1.97)	275(2.22)	48(2.89)	3368(2.07)	48(2.89)
	S+T	injury,poisoning and certain other consequrences of external causes	1(0.32)	4525(2.75)	1(0.32)	30(2.39)	37(0.7)	4459(2.84)	37(0.7)	144(0.68)	211(0)	4229(2.65)	211(0)	386(2.74)	23(2.97)	4506(2.75)	23(2.97)	49(1.58)	124(3.01)	4412(2.76)	124(3.01)	312(1.89)	11(0.22)	4508(3.09)	11(0.22)	584(4.24)	1(0.18)	4525(2.76)	1(0.18)	82(3.72)	168(4.37)	4304(2.71)	168(4.37)	289(1.88)	23(0.77)	4497(2.79)	23(0.77)	671(5.6)	39(3.82)	4470(2.73)	39(3.82)	100(2.45)	28(0.9)	4491(2.81)	28(0.9)	449(3.62)	61(3.67)	4448(2.73)	61(3.67)
	Z	Factors influencing health status and contact with health services	140(44.59)	21215(12.88)	140(44.59)	479(38.23)	2749(51.73)	17426(11.08)	2749(51.73)	10996(51.73)	718(11.08)	20396(12.77)	718(11.08)	2130(15.09)	44(5.68)	21380(13.03)	44(5.68)	222(7.17)	421(10.22)	20882(13.04)	421(10.22)	1454(8.82)	2984(58.54)	7454(5.11)	2984(58.54)	4043(29.32)	193(35.03)	21191(12.9)	193(35.03)	524(23.79)	128(3.33)	21226(13.36)	128(3.33)	1032(6.71)	1477(49.32)	19537(12.14)	1477(49.32)	5683(47.44)	50(4.89)	21377(13.06)	50(4.89)	306(7.49)	752(24.28)	20328(12.72)	752(24.28)	1861(15.02)	93(5.6)	21325(13.11)	93(5.6)
		c2		550.055		124.508		8698.77		429.35		1251.19		802.257		840.482		68.141		710.533		266.357		23904.1		2889.03		326.246		157.982		959.284		372.947		4294.31		686.6		645.926		161.369		996.988		696.424		554.678
		P		<0.001		<0.001		<0.001		<0.001		<0.001		<0.001		<0.001		<0.001		<0.001		<0.001		<0.001		<0.001		<0.001		<0.001		<0.001		<0.001		<0.001		<0.001		<0.001		<0.001		<0.001		<0.001		<0.001
Admission date time (year) (%)		2009	17(5.41)	13790(8.37)	17(5.41)	52(4.15)	381(7.17)	13241(8.42)	381(7.17)	1307(6.15)	328(9.3)	13440(8.41)	328(9.3)	1332(9.44)	81(10.47)	13713(8.35)	81(10.47)	337(10.89)	280(6.79)	13455(8.4)	280(6.79)	1370(8.31)	164(3.22)	13070(8.96)	164(3.22)	1050(7.62)	96(17.42)	13635(8.3)	96(17.42)	357(16.21)	251(6.53)	13464(8.47)	251(6.53)	1309(8.51)	542(18.1)	13096(8.14)	542(18.1)	1363(11.38)	79(7.73)	13680(8.36)	79(7.73)	532(13.02)	314(10.14)	13264(8.3)	314(10.14)	1210(9.77)	383(23.07)	13301(8.18)	383(23.07)
		2010	47(14.97)	14192(8.62)	47(14.97)	126(10.06)	430(8.09)	13615(8.66)	430(8.09)	1511(7.11)	372(10.54)	13750(8.61)	372(10.54)	1373(9.73)	82(10.59)	14138(8.61)	82(10.59)	300(9.69)	511(12.4)	13635(8.52)	511(12.4)	1549(9.4)	186(3.65)	13078(8.96)	186(3.65)	990(7.18)	111(20.15)	14048(8.55)	111(20.15)	298(13.53)	360(9.36)	13730(8.64)	360(9.36)	1330(8.65)	188(6.28)	13916(8.65)	188(6.28)	1233(10.29)	219(21.43)	13953(8.52)	219(21.43)	642(15.71)	211(6.81)	13926(8.72)	211(6.81)	1138(9.19)	346(20.84)	13737(8.44)	346(20.84)
		2011	30(9.55)	14124(8.58)	30(9.55)	111(8.86)	385(7.25)	13608(8.65)	385(7.25)	1486(6.99)	276(7.82)	13757(8.61)	276(7.82)	1066(7.55)	85(10.98)	14055(8.56)	85(10.98)	306(9.88)	449(10.9)	13652(8.53)	449(10.9)	1525(9.25)	199(3.9)	13102(8.98)	199(3.9)	945(6.85)	47(8.53)	14075(8.57)	47(8.53)	239(10.85)	320(8.32)	13664(8.6)	320(8.32)	1328(8.63)	212(7.08)	13808(8.58)	212(7.08)	1283(10.71)	142(13.89)	13926(8.51)	142(13.89)	496(12.14)	301(9.72)	13658(8.55)	301(9.72)	1216(9.82)	229(13.8)	13828(8.5)	229(13.8)
		2012	32(10.19)	16838(10.22)	32(10.19)	135(10.77)	453(8.52)	16225(10.32)	453(8.52)	1892(8.9)	268(7.6)	16465(10.31)	268(7.6)	1251(8.86)	52(6.72)	16832(10.25)	52(6.72)	340(10.98)	316(7.67)	16503(10.31)	316(7.67)	1583(9.6)	257(5.04)	15349(10.52)	257(5.04)	946(6.86)	46(8.35)	16793(10.22)	46(8.35)	228(10.35)	359(9.33)	16315(10.27)	359(9.33)	1559(10.13)	358(11.95)	16406(10.2)	358(11.95)	1390(11.6)	112(10.96)	16723(10.22)	112(10.96)	528(12.92)	378(12.21)	16232(10.16)	378(12.21)	1461(11.79)	167(10.06)	16648(10.23)	167(10.06)
		2013	20(6.37)	18097(10.99)	20(6.37)	124(9.9)	409(7.7)	17532(11.15)	409(7.7)	1976(9.3)	331(9.38)	17665(11.06)	331(9.38)	1543(10.93)	105(13.57)	18005(10.97)	105(13.57)	422(13.63)	409(9.92)	17620(11.01)	409(9.92)	1892(11.48)	271(5.32)	16389(11.23)	271(5.32)	985(7.14)	73(13.25)	18013(10.97)	73(13.25)	299(13.57)	373(9.7)	17523(11.03)	373(9.7)	1533(9.96)	309(10.32)	17656(10.97)	309(10.32)	1428(11.92)	113(11.06)	17989(10.99)	113(11.06)	510(12.48)	369(11.91)	17515(10.96)	369(11.91)	1438(11.61)	124(7.47)	17930(11.02)	124(7.47)
		2014	27(8.6)	17566(10.67)	27(8.6)	142(11.33)	366(6.89)	17013(10.82)	366(6.89)	1993(9.38)	440(12.47)	16957(10.62)	440(12.47)	1844(13.07)	89(11.5)	17472(10.64)	89(11.5)	380(12.27)	456(11.07)	17054(10.65)	456(11.07)	2149(13.04)	201(3.94)	15537(10.65)	201(3.94)	988(7.17)	40(7.26)	17537(10.68)	40(7.26)	210(9.53)	462(12.01)	16893(10.63)	462(12.01)	1777(11.55)	432(14.42)	16922(10.52)	432(14.42)	1407(11.74)	93(9.1)	17471(10.67)	93(9.1)	385(9.42)	435(14.05)	16871(10.56)	435(14.05)	1460(11.79)	127(7.65)	17385(10.69)	127(7.65)
		2015	20(6.37)	16542(10.04)	20(6.37)	124(9.9)	576(10.84)	15732(10)	576(10.84)	2274(10.7)	386(10.94)	16023(10.03)	386(10.94)	1389(9.84)	61(7.88)	16497(10.05)	61(7.88)	249(8.04)	404(9.8)	16150(10.09)	404(9.8)	1713(10.39)	266(5.22)	14494(9.93)	266(5.22)	1036(7.51)	29(5.26)	16523(10.06)	29(5.26)	166(7.54)	399(10.37)	15933(10.03)	399(10.37)	1542(10.02)	407(13.59)	15989(9.94)	407(13.59)	1136(9.48)	47(4.6)	16517(10.09)	47(4.6)	187(4.58)	299(9.65)	16011(10.02)	299(9.65)	1149(9.28)	143(8.61)	16306(10.02)	143(8.61)
		2016	9(2.87)	6115(3.71)	9(2.87)	62(4.95)	259(4.87)	5768(3.67)	259(4.87)	774(3.64)	180(5.1)	5852(3.66)	180(5.1)	512(3.63)	12(1.55)	6117(3.73)	12(1.55)	73(2.36)	214(5.19)	5898(3.68)	214(5.19)	604(3.66)	130(2.55)	5377(3.68)	130(2.55)	601(4.36)	12(2.18)	6117(3.72)	12(2.18)	53(2.41)	186(4.84)	5840(3.68)	186(4.84)	544(3.54)	106(3.54)	5997(3.73)	106(3.54)	465(3.88)	34(3.33)	6086(3.72)	34(3.33)	81(1.98)	116(3.75)	5934(3.71)	116(3.75)	473(3.82)	41(2.47)	6066(3.73)	41(2.47)
		2017	41(13.06)	14193(8.62)	41(13.06)	131(10.45)	555(10.44)	13385(8.51)	555(10.44)	2313(10.88)	320(9.07)	13672(8.56)	320(9.07)	1078(7.64)	51(6.59)	14174(8.64)	51(6.59)	205(6.62)	392(9.51)	13748(8.59)	392(9.51)	1348(8.18)	761(14.93)	12044(8.25)	761(14.93)	1640(11.89)	29(5.26)	14211(8.65)	29(5.26)	120(5.45)	366(9.52)	13533(8.52)	366(9.52)	1357(8.82)	219(7.31)	13996(8.7)	219(7.31)	842(7.03)	72(7.05)	14145(8.64)	72(7.05)	214(5.24)	276(8.91)	13754(8.61)	276(8.91)	1034(8.35)	63(3.8)	14158(8.7)	63(3.8)
		2018	38(12.1)	14383(8.73)	38(12.1)	113(9.02)	512(9.63)	13677(8.7)	512(9.63)	2166(10.19)	293(8.3)	13884(8.69)	293(8.3)	1212(8.59)	80(10.34)	14352(8.74)	80(10.34)	216(6.98)	342(8.3)	13963(8.72)	342(8.3)	1267(7.69)	1236(24.25)	12003(8.22)	1236(24.25)	1749(12.68)	28(5.08)	14430(8.79)	28(5.08)	97(4.4)	344(8.94)	13835(8.71)	344(8.94)	1369(8.9)	158(5.28)	14273(8.87)	158(5.28)	670(5.59)	50(4.89)	14392(8.79)	50(4.89)	216(5.29)	195(6.3)	14068(8.81)	195(6.3)	818(6.6)	24(1.45)	14433(8.87)	24(1.45)
		2019	33(10.51)	18568(11.27)	33(10.51)	128(10.22)	963(18.12)	17241(10.96)	963(18.12)	3478(16.36)	333(9.44)	17994(11.27)	333(9.44)	1489(10.55)	76(9.82)	18510(11.28)	76(9.82)	266(8.59)	343(8.32)	18137(11.33)	343(8.32)	1468(8.91)	1410(27.66)	15361(10.52)	1410(27.66)	2817(20.43)	40(7.26)	18584(11.32)	40(7.26)	134(6.08)	426(11.08)	17899(11.26)	426(11.08)	1715(11.15)	64(2.14)	18567(11.54)	64(2.14)	749(6.25)	58(5.68)	18550(11.33)	58(5.68)	291(7.12)	201(6.49)	18244(11.42)	201(6.49)	972(7.85)	12(0.72)	18625(11.45)	12(0.72)
		2020	0(0)	277(0.17)	0(0)	5(0.4)	25(0.47)	235(0.15)	25(0.47)	86(0.4)	1(0.03)	274(0.17)	1(0.03)	23(0.16)	0(0)	276(0.17)	0(0)	2(0.06)	5(0.12)	271(0.17)	5(0.12)	16(0.1)	16(0.31)	144(0.1)	16(0.31)	41(0.3)	0(0)	276(0.17)	0(0)	2(0.09)	0(0)	276(0.17)	0(0)	21(0.14)	0(0)	277(0.17)	0(0)	14(0.12)	3(0.29)	273(0.17)	3(0.29)	4(0.1)	2(0.06)	274(0.17)	2(0.06)	19(0.15)	1(0.06)	276(0.17)	1(0.06)
		c2		42.364		22.854		488.964		82.507		103.653		48.387		49.688		25.325		203.775		109.682		4154.24		811.865		192.147		25.247		60.979		40.809		752.758		295.858		315.737		57.325		169.331		36.449		1146.68
		P		<0.001		0.019		<0.001		<0.001		<0.001		<0.001		<0.001		0.008		<0.001		<0.001		<0.001		<0.001		<0.001		<0.001		<0.001		<0.001		<0.001		<0.001		<0.001		<0.001		<0.001		<0.001		<0.001
PS score		PS score	0.002±0.001	0.002±0.000	0.002±0.12	0.002±0.001	0.058±0.04	0.032±0.02	0.058±0.04	0.058±0.04	0.0233±0.006	0.0216±0.006	0.0233±0.006	0.0233±0.006	0.008±0.005	0.005±0.005	0.008±0.005	0.008±0.005	0.030±0.011	0.025±0.011	0.030±0.011	0.030±0.011	0.145±0.12	0.030±0.043	0.145±0.12	0.087±0.101	0.007±0.006	0.003±0.003	0.007±0.006	0.007±0.006	0.033±0.015	0.023±0.014	0.033±0.015	0.033±0.015	0.047±0.035	0.018±0.022	0.047±0.035	0.047±0.035	0.009±0.005	0.006±0.004	0.009±0.005	0.009±0.005	0.026±0.011	0.019±0.011	0.026±0.011	0.026±0.011	0.021±0.015	0.010±0.010	0.021±0.015
		t		-6.664		-0.086		-48.582		-0.039		-18.341		-0.001		-23.027		-0.001		-31.145		-0.001		-68.526		-30.796		-13.4812		-0.051		-42.258		-0.001		-45.166		-0.002		-21.531		-0.045		-36.078		-0.001		-31.714
		P		<0.001		0.931		<0.001		0.969		<0.001		0.999		<0.001		0.999		<0.001		0.999		<0.001		<0.001		<0.001		0.959		<0.001		0.999		<0.001		0.998021		<0.001		0.964		<0.001		0.999		<0.001
[truncated: 37 more columns]
